# Supplementary material for: SCL, LMO1 and Notch1 Reprogram Thymocytes into Self-Renewing Cells
Source: PubMed Central journal article supplement (PMC4270438; doi:10.1371/journal.pgen.1004768), 2014-12-18

# Figure S1

A

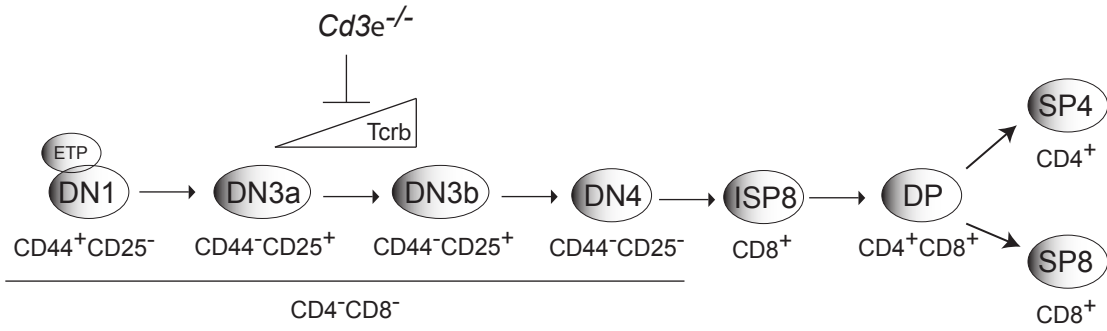

B

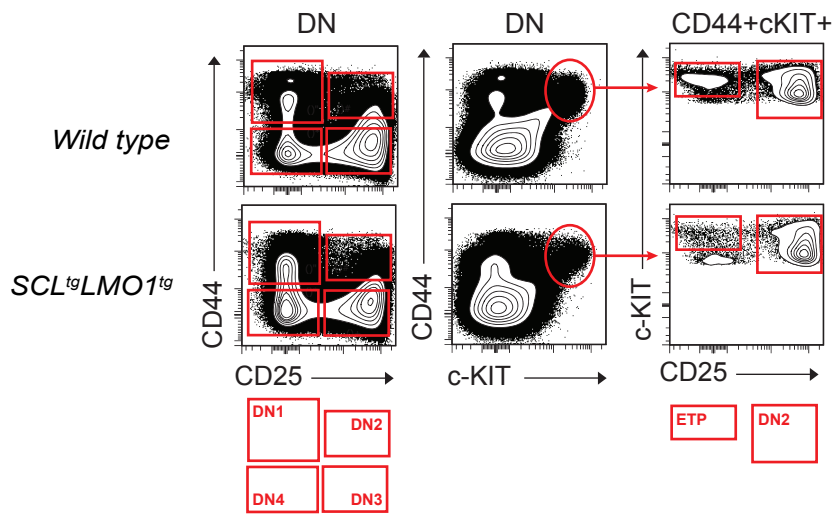

C

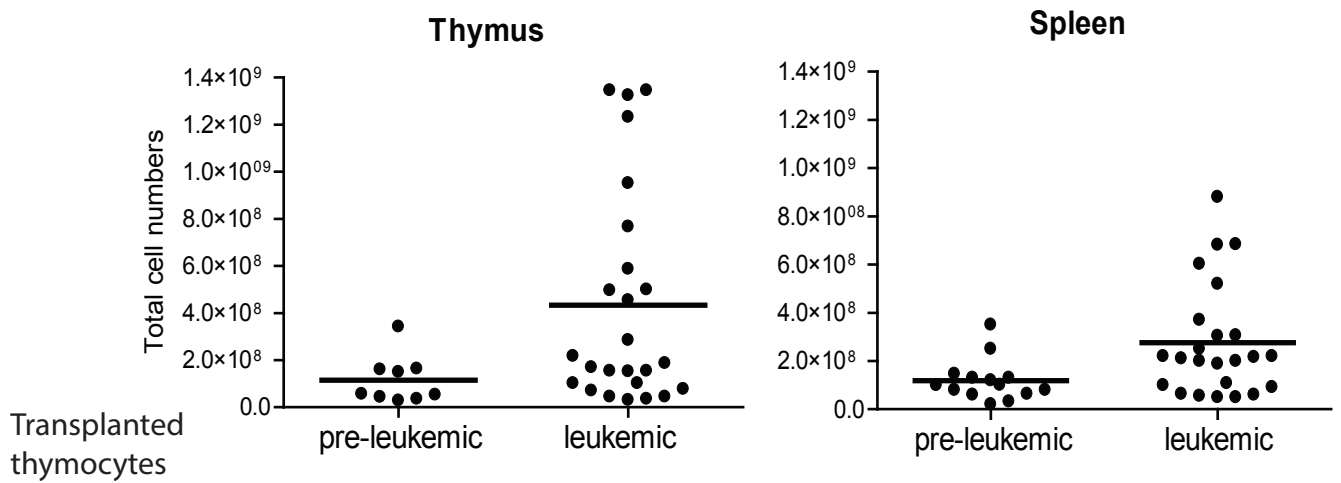

Supplement: pgen.1004768.s001.pdf [file pgen.1004768.s001.pdf]
