# Supplementary material for: SCL, LMO1 and Notch1 Reprogram Thymocytes into Self-Renewing Cells
Source: PLoS Genet. 2014 Dec 18;10(12):e1004768. doi: 10.1371/journal.pgen.1004768 (PMC4270438; doi:10.1371/journal.pgen.1004768)
Supplement: S5 Table — Sequences of oligonucleotide primers used for TaqMan Real-time quantitative PCR, TCRβ gene rearrangements, chromatin immunoprecipitation and for Sanger sequencing of exons 26, 27 and 34 of the Notch1 gene. Provided in excel file. (XLS) [file pgen.1004768.s016.xls]

## Sheet: PCR primers
Table S5
	Oligonucleotide	Sequences
RT-PCR	Lyl-1 Forward	AGATGAGGAAACGCCCTGTA
	Lyl-1 Reverse	AGCCACTGCAAGTAGCCTGT
	Hes1 Forward	CCAAGCTAGAGAAGGCAGACA
	Hes1 Reverse	GTCACCTCGTTCATGCACTC
	b-actin Forward	CTGTCGAGTCGCGTCCACCC
	b-actin Reverse	CCACCATCACACCCTGGTGCC
TCRb gene rearrangements	Vb5 Forward	CCCAGCAGATTCTCAGTCCAACAG
	Vb8 Forward	GCATGGGCTGAGGCTGATCCATTA
	Jb2 Reverse	TGAGAGCTGTCTCCTACTATCGATT
Chromatin immunoprecipitation	Lyl-1 promoter Forward	GTTTCTTGGGCTCAGCTGTC
	Lyl-1 promoter Reverse	TACTCTAGGGGGAGGGGAGA
Notch1 sequencing	Exon 26 Forward	ACGGGAGGACCTAACCAAAC
	Exon 26 Reverse	CAGCTTGGTCTCCAACACCT
	Exon 27 Forward	CGCTGAGTGCTAAACACTGG
	Exon 27 Reverse	GTTTTGCCTGCATGTACGTC
	Exon 34 Forward (1)	GCTCCCTCATGTACCTCCTG
	Exon 34 Reverse (1)	TAGTGGCCCCATCATGCTAT
	Exon 34 Forward (2)	ATAGCATGATGGGGCCACTA
	Exon 34 Reverse (2)	CTTCACCCTGACCAGGAAAA
	Exon 34 Forward (3)	ACCCCATGGCTACTTGTCAG
	Exon 34 Reverse (3)	CCACAGGGGAGGAGGAGTAA
